# 1     **Galectin-3 inhibits *Paracoccidioides brasiliensis* growth and** 2           **impacts paracoccidioidomycosis through multiple** 3                   **mechanisms**

4  
5     **Otavio Hatanaka<sup>1</sup>, Caroline Patini Rezende<sup>1</sup>, Pedro Moreno<sup>1</sup>, Fabrício Freitas**  
6     **Fernandes<sup>2</sup>, Patrícia Kellen Martins Oliveira Brito<sup>2</sup>, Roberto Martinez<sup>3</sup>,**  
7     **Carolina Coelho<sup>4,5</sup>, Maria Cristina Roque-Barreira<sup>2</sup>, Arturo Casadevall<sup>6</sup>, Fausto**  
8     **Almeida<sup>1\*</sup>**

9  
10    <sup>1</sup>Department of Biochemistry and Immunology, Ribeirao Preto Medical School,  
11    University of Sao Paulo, Ribeirao Preto, SP, 14049-900, Brazil

12   <sup>2</sup>Department of Cellular and Molecular Biology, Ribeirao Preto Medical School,  
13    University of Sao Paulo, Ribeirao Preto, SP, 14049-900, Brazil

14   <sup>3</sup>Department of Internal Medicine, Ribeirao Preto Medical School, University of Sao  
15    Paulo, Ribeirao Preto, SP, 14048-900, Brazil

16   <sup>4</sup>Department of Biosciences, College of Life and Environmental Sciences, University  
17    of Exeter, Exeter, UK

18   <sup>5</sup>Medical Research Council Centre for Medical Mycology, University of Aberdeen,  
19    Aberdeen, UK

20   <sup>6</sup>Department of Molecular Microbiology and Immunology, Johns Hopkins Bloomberg  
21    School of Public Health, Baltimore, MD, 21205, USA

22  
23    \* **Correspondence:**

24    Fausto Almeida

25    fbralmeida@usp.br

## ABSTRACT

The thermomorphogenic pathogenic fungi *Paracoccidioides brasiliensis* and *Paracoccidioides lutzii* are the etiologic causes of paracoccidioidomycosis (PCM), the most prevalent systemic mycosis in Latin America. Galectin-3 (Gal-3), an animal  $\beta$ -galactoside-binding protein, modulates important roles during microbial infections, such as triggering a Th2-polarized immune response in PCM. Herein, we demonstrate that Gal-3 also plays other important roles in *P. brasiliensis* infection. We verified Gal-3 levels are upregulated in human and mice infections and establish that Gal-3 inhibits *P. brasiliensis* growth by inhibiting budding. Furthermore, Gal-3 affects disruption and internalization of extracellular vesicles (EV) from *P. brasiliensis* by macrophages. Our results suggest important roles for Gal-3 in *P. brasiliensis* infection, indicating that increased Gal-3 production during *P. brasiliensis* infection may account for affecting the fungal growth and EV stability, promoting a benefic course of experimental PCM.

Keywords: Galectin-3, *Paracoccidioides brasiliensis*, Extracellular vesicles, fungal infection.

## IMPORTANCE

Paracoccidioidomycosis (PCM) is the most prevalent systemic mycosis in Latin America. Although the immune mechanisms to control PCM are still not fully understood, several events of the host innate and adaptive immunity are crucial to determine the progress of the infection. Mammalian  $\beta$ -galactoside-binding protein Galectin-3 (Gal-3) plays significant roles during microbial infections, and has been studied for its immunomodulatory roles but it can also have direct antimicrobial effects. We asked whether this protein plays a role in *P. brasiliensis*. We report herein that Gal-3 indeed has direct effects on fungal pathogen, inhibiting fungal growth and reducing extracellular vesicles stability. Our results suggest a direct role for Gal-3 in *P. brasiliensis* infection, with beneficial effects for the mammalian host.

## INTRODUCTION

Paracoccidioidomycosis (PCM), the most prevalent systemic mycosis in Latin America, is caused by the thermodimorphic human pathogens *Paracoccidioides brasiliensis* and *Paracoccidioides lutzii*. After inhalation of airborne propagules from fungal mycelia phase, in the lungs the fungi convert into the infectious form - yeast phase (1-3). The yeast can spread to several organs causing systemic disease (4). Human defense against PCM depends on satisfactory cellular immune response and cytokine production (5, 6). Immune mechanisms that prevented cell division and budding of the fungal cells could aid in the control the PCM.

Extracellular vesicles (EVs) are produced by all living cells, and actively participate as key regulators of physiopathological mechanisms during fungal infections (7, 8). Fungal EVs carry several virulence factors and other important molecules, contributing to fungal pathogenicity and host immunomodulation (9-14). Since EVs plays significant roles in the host-pathogen relationship, the vesicular stability is important to ensure suitable delivery of their cargo into host cells (13, 15).

Bacterial and eukaryotic pathogens present surface glycans that may be recognized by host carbohydrate-binding proteins. These interactions commonly affect the microorganism pathogenesis, the host immune response or the success of intracellular parasitism (16-19). Recently, we have reported that Galectin-3 (Gal-3), a  $\beta$ -galactoside-binding animal lectin, plays significant roles in cryptococcal infection (13). Gal-3 interferes the *C. neoformans* infection, inhibiting *C. neoformans* growth and promoting vesicle disruption (13). Also, Gal-3 has been reported to influence the outcome of other mycoses, such as *Candida albicans* (20) and *Histoplasma capsulatum* (21). In *Paracoccidioides brasiliensis*, Gal-3 was reported to play an immunomodulatory role in the host response (22). Since Gal-3 can influence host response against PCM, as well as several other microbial infections, and regulates different functions in the physiopathology of infections, we explored whether Gal-3 influence *P. brasiliensis* growth and vesicle stability.

In this work, we assessed the Gal-3 levels in humans and mice with PCM. Also, we demonstrated the influence of Gal-3 in the *P. brasiliensis* growth and stability of EVs. Our results demonstrate that Gal-3 inhibits growth and budding of *P. brasiliensis* yeast cells, and promotes vesicle disruption. Our results suggest that Gal-3 can impacts the interaction of *P. brasiliensis* with host cells.

## 97     **RESULTS**

### 98     **Gal-3 is up-regulated during PCM**

99             Since increased Gal-3 expression was previously described during human and  
100     experimental inflammatory diseases (23, 24), and recently in *C. neoformans* infection  
101     (13), we measured Gal-3 levels in serum samples from individuals suffering of PCM,  
102     either acute or chronic PCM form. Compared to the healthy individuals, the acute and  
103     chronic form patients showed higher Gal-3 serum levels, as shown previously for  
104     other infections (Figure 1). There was no significant difference (*P* value: 0.4204,  
105     unpaired t-test) between the Gal-3 levels in sera of acute and chronic patients with  
106     PCM.

107             Subsequently, we measured Gal-3 levels in tissues and serum of C57BL/6 mice  
108     on days 30 and 60 post-infection with *P. brasiliensis* (Figure 2). In comparison with  
109     control animals (PBS), infected mice had higher Gal-3 levels in all examined tissues  
110     (lungs and spleen, Figure 2B and 2C, respectively) and serum samples (Figure 2A).  
111     As previously reported for *C. neoformans* infection, there is a correlation between *P.*  
112     *brasiliensis* infection and increased levels of serum Gal-3, which could reflect the  
113     inflammatory conditions caused by these infectious diseases.

### 114     **Gal-3 inhibits *P. brasiliensis* growth**

115             Since *P. brasiliensis* cell division and budding is crucial to successful PCM,  
116     and Gal-3 inhibits *C. neoformans* growth (13), we evaluated whether Gal-3 could  
117     affect the growth and budding of *P. brasiliensis*. *P. brasiliensis* growth in culture,  
118     measured by MTT assay, was compared between Gal-3 treated, PBS- and denatured  
119     Gal-3-treated yeasts. Gal-3 inhibited *P. brasiliensis* growth by approximately 50%

after 72 h compared with the controls (denatured Gal-3 treated or PBS) (Figure 3). To verify whether Gal-3 treatment of fungal yeast induces yeast death, we performed viability assays using fluorescein diacetate/ethidium bromide staining. Gal-3 treated and control cultures contained similar proportions of viable cells up until 72 h after Gal-3 treatment, and all cultures were >80% viable (data not shown). To further characterize Gal-3 effects in the growth of *P. brasiliensis*, we evaluated the average number of cells with buds in the yeast culture in the presence or absence of Gal-3 for 72h, as well as in the presence of denatured Gal-3. We counted the budded or unbudded yeast cell via direct observation in a Neubauer chamber (Figure 3B). The average number of budding cells was 80% in both untreated and denatured Gal-3-treated cells. On the other hand, the average was decreased to 49% in Gal-3-treated cells.

Flow cytometry assessment of the Gal-3 binding to *P. brasiliensis* Pb18 strain showed that Gal-3 bound to *P. brasiliensis* cells (Figure 4A). Confocal microscopy demonstrated that Gal-3 co-localized with calcofluor white, a cell wall dye (Figure 4B-D and Supplementary Figure 1). Calcofluor white was used as a positive control as it binds to the cell wall (CW). These results suggest that the recognition of the fungal cell wall by Gal-3, through an unknown sugar moiety, may explain its inhibitory effect in *P. brasiliensis in vitro* growth.

### **Gal-3 disrupted *P. brasiliensis* EVs**

Exposure of EVs produced by *C. neoformans* to Gal-3, macrophages, or bovine serum albumin causes vesicular disruption (13, 15). We asked whether Gal-3 would affect the stability of EVs produced by *P. brasiliensis*. Addition of Gal-3 to radiolabeled EVs promoted vesicular disruption and subsequent radioactive release in

a dose-dependent manner (Figure 5A). Furthermore, we blocked Gal-3 carbohydrate recognition domain (CRD) by pre-incubating with N-acetyl-lactosamine (lactosamine, Gal-3 glycoligand) and by Gal-3 denaturation (boiling at 10 min for 100 °C). Both denatured and lactosamine-bound Gal3 had no lytic effect on *P. brasiliensis* EVs (Figure 5A), suggesting that intact 3D conformation and Gal-3 CRD are important for the Gal-3 lysing activity. Moreover, radioactive assays showed that other lectins were unable to lyse *P. brasiliensis* EVs (Figure 5B).

### **Gal-3 affects macrophages capability to disrupt and internalize EVs**

Given that Gal-3 is expressed and play a myriad roles in macrophage populations (25-27) and on the previous observation that macrophages (15) and Gal-3 can disrupt EVs from *C. neoformans* (13) and *P. brasiliensis* (this study), we evaluated whether these Gal3 binding and EV lysis could be correlated for *P. brasiliensis*. The addition of radiolabeled EVs from *P. brasiliensis* to the macrophages showed that WT peritoneal macrophages were approximately three times more effective than *Gal-3*<sup>-/-</sup> macrophages to disrupt EVs (black bars, Figure 6). Moreover, we demonstrated that uptake of EVs from *P. brasiliensis* by WT peritoneal macrophages gradually increased, whereas the uptake by *Gal-3*<sup>-/-</sup> peritoneal macrophages increased significantly less (Figure 6).

## **DISCUSSION**

Herein we describe a role for Gal-3 in *P. brasiliensis* infection that parallels recent observations with *C. neoformans* (13). Galectins are able to regulate positively or negatively host-microbial interactions in respiratory infections according to galectin type, pathogen and host context (28, 29). Gal-3, member of the galectin

family of  $\beta$ -galactosides-binding proteins, is widely expressed in different cells, and plays important roles in biological phenomena, such as inflammation and immunity (28, 30).

Our previous results in experimental models of cryptococcosis showed Gal-3 were increased during infection (13). This observation was replicated in human serum where higher levels of Gal-3 were detected in patients with cryptococcosis when compared with healthy individuals (13). The low number of patients available for study prevented us from making definitive statements regarding increase of Gal-3 in human infection, but in a prior study (13) Gal-3 was shown to be increased in infection and therefore it is very likely that the increase we observed is true in *P. brasiliensis* infection. Moreover, our results show that Gal-3 inhibits the fungal growth and morphogenesis of *P. brasiliensis*, a fungistatic effect of Gal-3 comparable to what was previously verified for *C. neoformans* (13). In mouse models deficiency of Gal-3 lead to an increased microbe burden and a decreased survival of the animals (13, 20, 22, 31). Furthermore *gal3*<sup>-/-</sup> mice die faster than wild-type mice when infected with *P. brasiliensis* (22). Gal-3 antifungal effects are widely conserved, affecting most (if not all) fungal pathogens and reaffirming Gal-3 as a critical player in antifungal defenses.

Gal-3 promoted disruption of *C. neoformans* EVs and influenced the uptake of EV content by macrophages (13), and we now replicate these observations for *P. brasiliensis*. The disruption mechanism of EVs remains cryptic. As discussed previously (13), albumin induce vesicles disruption (15) and albumin can bind to fatty acids (32) and sterols (33) and may promote membrane destabilization. However we cannot propose a similar mechanism for Gal-3 mediated disruption of EVs, particularly since Gal-3 is not known to bind lipids. We showed Gal-3 disrupts EVs in



a manner dependent on denaturation and the CRD domain, and we hypothesize the existence of a novel mechanism of EV disruption. Gal-3 binds beta-galactosides, in proteins (34) and microbe surfaces (specifically the fungal cell wall), and it is likely that a version of this galactoside is displayed on the surface of microbial EVs. Further studies are needed to discern the glycan moiety recognized in fungal EVs (and whether the glycan moiety is associated to proteins or instead to an putative carbohydrate polymers present in EVs) and how this binding triggers collapse of the lipid bilayer to disrupt EVs. In any case, this may constitute an important mechanism of immune defense: Gal-3 lysis of EVs would prevent EVs' delivery of a concentrated cargo of virulence factors at the host cell surface and instead result in diluted release of fungal components into the extracellular milieu and heightened degradation by host extracellular enzymes.

We conclude that Gal-3 is beneficial for the mammalian host during *P. brasiliensis* infection by contributing to host defense. As previously reported for *C. neoformans* (13), the antimicrobial mechanism of Gal-3 is due to a combination of microbial vesicle lysis, coupled to inhibition of fungal growth and morphogenesis. In addition to direct antimicrobial effects, Gal-3 plays immunomodulatory roles (31, 35-37) that may synergize with the antimicrobial effects. Multiple inhibitors of Gal-3 have been designed (38) – and are being tested for antitumorigenic properties. However our data reveals that these therapies may predispose patients for fungal infections and, as is the case for many immunotherapies, it is important to closely monitor fungal infections in these patients. In the case of fungal infections, it may be desirable to design a Gal-3 mimetic that, through inhibition of growth and interference with EV release, would act as a potent antifungal therapy.

## METHODS

### Ethics statement

All animal use complied with the standards described in Ethical Principles Guide in Animal Research adopted by the Brazilian College of Animal Experimentation. The protocols were approved by the Committee of Ethics in Animal Research of the Ribeirao Preto Medical School at the University of Sao Paulo (protocol 20/2013-1). Informed written consent from all participants was obtained. The studies involving patients were approved by the Research Ethics Committee of the University Hospital, Ribeirao Preto Medical School at the University of Sao Paulo (protocol HCRP 13.982/2005).

### Mice and *P. brasiliensis* strain

We used male C57BL/6 (wild-type, WT, Jax 000664) and galectin-3-deficient mice (*gal3<sup>-/-</sup>*) at 6 to 8 weeks of age. Knockout mice were kindly donated by FT Liu (University of California, Davis, CA). *Gal3<sup>-/-</sup>* mice were previously generated as described and crossbred to the C57BL/6 mouse background for nine generations (39). The animals were housed in the animal facility of the Ribeirao Preto Medical School, University of São Paulo, under optimized hygienic conditions. All *P. brasiliensis* experiments were performed with the Pb18 isolate. Fungal cultures were grown in the YPD medium (2% peptone, 1% yeast extract, and 2% glucose) in the yeast phase, at 36 °C. To ensure yeast virulence, serial passages in BALB/c mice were performed before the isolate Pb18 was used in experiments.

### Sera and patients

Blood samples were obtained from patients being seen in the University Hospital, Ribeirao Preto Medical School at the University of Sao Paulo. A total of 6 patients with diagnosed paracoccidioidomycosis were included in this study: 3 patients with acute and 3 patients with chronic form. Serum was obtained and stored at -80°C. Samples were also obtained from 3 blood donors with a median age of 30 years (range, 25-35 years).

### **Gal-3 levels**

Gal-3 levels in the lung, serum and spleen was quantified in the organ homogenates of *P. brasiliensis*-infected mice. The homogenate samples (whole organ in 1 ml of PBS) of control mice or from animals infected with *P. brasiliensis*, as well as the serum samples from infected animals or from patients with diagnosed paracoccidioidomycosis, were stored at -80°C until assayed. All samples were thawed only once prior to use. Gal-3 levels were measured using commercially available enzyme-linked immunosorbent assay (ELISA) kits (Sigma-Aldrich, St. Louis, MO, USA) according to the manufacturer's instructions.

### **Cell viability and growth in the presence of Gal-3**

Fungal viability was determined using fluorescein diacetate/ethidium bromide staining. Only the cultures that were greater than 85% viable were used.

To verify Gal-3 effect on the cells, we performed growth curves in YPD liquid medium containing different concentrations of Gal-3 (Gal-3 human recombinant, expressed in *E. coli*, Sigma-Aldrich) in a 96-well plate (Costar, NY, USA). The Gal-3 effect on cell proliferation was determined using an MTT assay (40), as follows: *P. brasiliensis* yeast cells were suspended in YPD medium at a density of  $10^6$  cells/ml,

and Gal-3, denatured Gal-3 or PBS were used as control. After incubation at 37°C in an orbital shaker (150 rpm) for 120 h. To verify the Gal-3 effect in the yeast budding, we assessed the average number of Pb18 strain cells with buds found in yeasts cultures after 72 h of Gal-3 treatment and compared to the cells treated with denatured Gal-3 and PBS treated. Counting was carried out in a Neubauer chamber by optical microscopy, considering as budding cells, the yeasts that presented at least one or more bud.

### **Gal-3 binding assay and confocal microscopy**

The Gal-3 binding assay and confocal microscopy were performed as previously described for *C. neoformans* (13) using *P. brasiliensis* yeast cells. Gal-3 binding assay was performed with yeast cells incubated with PBS containing 10% fetal bovine serum for 20 min at 4°C to block non-specific binding of antibodies. Next, 1 ml of the suspension containing  $10^6$  cells were incubated with either Gal-3 (40 µg/ml) and denatured Gal-3 (40 µg/ml) for 40 min at 4°C. Cells were washed twice with PBS and anti-Gal-3 antibody (1:50; Sigma-Aldrich) was added; after incubation for 45 min, the cells were washed twice with PBS and incubated with anti-rabbit IgG-FITC antibody (1:50; Sigma-Aldrich) for 40 min at 4°C. Gal-3 binding to *P. brasiliensis* cells was analyzed by flow cytometry (Guava easyCyte, Guava Technologies, Millipore, Hayward, CA, USA). Anti-rabbit IgG-FITC antibody associated or not with Gal-3 and WGA lectin (30 µg/ml) were used as negative and positive controls, respectively. The confocal microscopy was performed with cells incubated with Gal-3 (40 µg/ml) at 37°C for 1 h followed by three washes with PBS and fixation with PBS-buffered 3.7% formaldehyde at 25°C. The samples were washed three times with PBS and treated with glycine 0.1 M for 15 min, and blocked with BSA (1% in PBS) for 1 h at

25°C. Then, the cells were incubated with a rabbit anti-Gal-3 antibody (Sigma-Aldrich) overnight at 4°C. The samples were washed five times with PBS and incubated for 1 h with FITC-labeled donkey anti-rabbit IgG from Jackson Immuno Research Laboratories. For cell wall staining, samples were incubated with Calcofluor White (50 µg/ml, Sigma-Aldrich) in PBS for 20 min. After five washes with PBS, cells were placed on slide and coverslips mounted with Fluoromount-G (Electron Microscopy Sciences). The samples were examined with a LSM780 system AxioObserver, 63X oil immersion (Carl Zeiss, Jena, Germany). The images were analyzed offline using the ImageJ software (<http://rsb.info.nih.gov/ij/>). Secondary antibody alone was used as controls. All controls were negative.

### **Analysis of the stability of extracellular vesicles**

EVs were isolated as previously described (41). Vesicles quantification was measured by Nanoparticle-Tracking Analysis (NTA) using a NanoSight NS300 (Malvern Instruments, Malvern, UK) equipped with fast video capture and particle-tracking software, as previously described (14). Purified vesicles from *P. brasiliensis* were diluted into PBS, and each sample was then injected into a NanoSight sample cubicle. The measurements were obtained in triplicate and analyzed using NanoSight software (version 3.2.16). The EVs stability was evaluated according to protocols previously described (13). EVs were incubated with Gal-3 (Gal-3 human recombinant, expressed in *E. coli*, Sigma-Aldrich) at different final concentration (0 to 10 µg/ml), and the concentrations of all control lectins were normalized according to carbohydrate binding sites. EVs stability was examined by radioactive assay through cultivation of *P. brasiliensis* in the presence of [ $^{14}\text{C}$ ] palmitic acid, as previously described for *C. neoformans* (13, 15). The suspension of radiolabeled EVs was incubated with Gal-3 at

37°C for different times and concentrations, and the suspension was ultracentrifuged at 100,000 X g for 1 h at 4°C. Supernatants and pellets were saved for scintillation counting.

### **Vesicle disruption and uptake by macrophages**

To assess the vesicle stability and vesicle uptake by macrophages from WT and gal3<sup>-/-</sup> mice, we used the protocol previously described (13). Peritoneal macrophages were obtained from C57BL/6 WT or gal3<sup>-/-</sup> mice, and grown in DME medium (Invitrogen) supplemented with 10% (v/v) fetal bovine serum, 10% NCTC (Invitrogen), 1% nonessential amino acids (Invitrogen) and 1% penicillin (Invitrogen). 48-well tissue culture plates were seeded with elicited peritoneal macrophages (4 x 10<sup>5</sup> cells/well). EVs were obtained from *P. brasiliensis* cultures that were pulsed with [1-<sup>14</sup>C] palmitic acid 72 h before EVs harvesting, and added to macrophage cultures as previously described (13). The adhered cells (containing EVs due to uptake), supernatants (containing components of disrupted EVs) and pellets (containing intact EVs) were saved for scintillation counting. The radioactivity distribution in the three fractions was expressed as percent of the total radioactivity.

### **Statistical Analysis**

Data are either the means of or representative results from at least 3 independent experiments, each performed in triplicated. All statistical analyses and comparisons were performed using the *GraphPad Prism* Software version 6.0 (GraphPad Software, San Diego, CA, USA). A *P* value < 0.05 was considered statistically significant.

### **ACKNOWLEDGEMENTS**

We thank Patricia Vendruscolo and Roberta Ribeiro Costa Rosales from Ribeirao Preto Medical School, Sao Paulo, Brazil, for technical support. FA received funding from Fundação de Amparo à Pesquisa do Estado de São Paulo (2016/03322-7, 2016/15055-3) - Project Young Researcher, CNPq (Conselho Nacional de Desenvolvimento Científico e Tecnológico, and CAPES (Coordenação de Aperfeiçoamento de Nível Superior). AC was supported in part by NIH awards AI033142, AI052733 and HL059842.

# **AUTHORS CONTRIBUTIONS**

All of the authors contributed to the research design and data analyses. Performed the experiments: OH, CP, PM, FF, PK, FA. Contributed reagents/materials/analysis tools: RM, MC, AC, FA. Wrote the paper: OH, CP, PM, CC, MC, AC, FA.

# **COMPETING FINANCIAL INTERESTS**

The authors declare no competing financial interests.

## 362 REFERENCES

- 363 1. **Brummer E, Castaneda E, Restrepo A.** 1993. Paracoccidioidomycosis:  
364 an update. Clin Microbiol Rev **6**:89-117.
- 365 2. **Restrepo A, McEwen JG, Castaneda E.** 2001. The habitat of  
366 Paracoccidioides brasiliensis: how far from solving the riddle? Med Mycol  
367 **39**:233-241.
- 368 3. **Shikanai-Yasuda MA, Mendes RP, Colombo AL, Queiroz-Telles F,**  
369 **Kono ASG, Paniago AMM, Nathan A, Valle A, Bagagli E, Benard G,**  
370 **Ferreira MS, Teixeira MM, Silva-Vergara ML, Pereira RM, Cavalcante**  
371 **RS, Hahn R, Durlacher RR, Khoury Z, Camargo ZP, Moretti ML,**  
372 **Martinez R.** 2017. Brazilian guidelines for the clinical management of  
373 paracoccidioidomycosis. Rev Soc Bras Med Trop **50**:715-740.
- 374 4. **Franco M, Peracoli MT, Soares A, Montenegro R, Mendes RP, Meira**  
375 **DA.** 1993. Host-parasite relationship in paracoccidioidomycosis. Curr Top  
376 Med Mycol **5**:115-149.
- 377 5. **Franco M, Montenegro MR, Mendes RP, Marques SA, Dillon NL, Mota**  
378 **NG.** 1987. Paracoccidioidomycosis: a recently proposed classification of  
379 its clinical forms. Rev Soc Bras Med Trop **20**:129-132.
- 380 6. **Borges-Walmsley MI, Chen D, Shu X, Walmsley AR.** 2002. The  
381 pathobiology of Paracoccidioides brasiliensis. Trends Microbiol **10**:80-87.
- 382 7. **Brown L, Wolf JM, Prados-Rosales R, Casadevall A.** 2015. Through the  
383 wall: extracellular vesicles in Gram-positive bacteria, mycobacteria and  
384 fungi. Nature Reviews Microbiology **13**:620-630.
- 385 8. **Rodrigues ML, Casadevall A.** 2018. A two-way road: novel roles for  
386 fungal extracellular vesicles. Mol Microbiol doi:10.1111/mmi.14095.
- 387 9. **Rodrigues ML, Nakayasu ES, Oliveira DL, Nimrichter L, Nosanchuk JD,**  
388 **Almeida IC, Casadevall A.** 2008. Extracellular vesicles produced by  
389 Cryptococcus neoformans contain protein components associated with  
390 virulence. Eukaryotic Cell **7**:58-67.
- 391 10. **Oliveira DL, Freire-de-Lima CG, Nosanchuk JD, Casadevall A,**  
392 **Rodrigues ML, Nimrichter L.** 2010. Extracellular vesicles from  
393 Cryptococcus neoformans modulate macrophage functions. Infect Immun  
394 **78**:1601-1609.
- 395 11. **da Silva TA, Roque-Barreira MC, Casadevall A, Almeida F.** 2016.  
396 Extracellular vesicles from Paracoccidioides brasiliensis induced M1  
397 polarization in vitro. Scientific Reports **6**.
- 398 12. **Vargas G, Rocha JD, Oliveira DL, Albuquerque PC, Frases S, Santos SS,**  
399 **Nosanchuk JD, Gomes AM, Medeiros LC, Miranda K, Sobreira TJ,**  
400 **Nakayasu ES, Arigi EA, Casadevall A, Guimaraes AJ, Rodrigues ML,**  
401 **Freire-de-Lima CG, Almeida IC, Nimrichter L.** 2015. Compositional and  
402 immunobiological analyses of extracellular vesicles released by Candida  
403 albicans. Cell Microbiol **17**:389-407.
- 404 13. **Almeida F, Wolf JM, da Silva TA, DeLeon-Rodriguez CM, Rezende CP,**  
405 **Pessoni AM, Fernandes FF, Silva-Rocha R, Martinez R, Rodrigues ML,**  
406 **Roque-Barreira MC, Casadevall A.** 2017. Galectin-3 impacts  
407 Cryptococcus neoformans infection through direct antifungal effects. Nat  
408 Commun **8**:1968.



- 409 14. **Bitencourt TA, Rezende CP, Quaresemin NR, Moreno P, Hatanaka O,**  
410 **Rossi A, Martinez-Rossi NM, Almeida F.** 2018. Extracellular Vesicles  
411 From the Dermatophyte *Trichophyton interdigitale* Modulate  
412 Macrophage and Keratinocyte Functions. *Front Immunol* **9**:2343.
- 413 15. **Wolf JM, Rivera J, Casadevall A.** 2012. Serum albumin disrupts  
414 *Cryptococcus neoformans* and *Bacillus anthracis* extracellular vesicles.  
415 *Cellular Microbiology* **14**:762-773.
- 416 16. **Vasta GR.** 2009. Roles of galectins in infection. *Nat Rev Microbiol* **7**:424-  
417 438.
- 418 17. **Dos Reis Almeida FB, Pigosso LL, de Lima Damasio AR, Monteiro VN,**  
419 **de Almeida Soares CM, Silva RN, Roque-Barreira MC.** 2014. alpha-  
420 (1,4)-Amylase, but not alpha- and beta-(1,3)-glucanases, may be  
421 responsible for the impaired growth and morphogenesis of  
422 *Paracoccidioides brasiliensis* induced by N-glycosylation inhibition. *Yeast*  
423 **31**:1-11.
- 424 18. **Fernandes FF, Oliveira AF, Landgraf TN, Cunha C, Carvalho A,**  
425 **Vendruscolo PE, Goncales RA, Almeida F, da Silva TA, Rodrigues F,**  
426 **Roque-Barreira MC.** 2017. Impact of Paracoccin Gene Silencing on  
427 *Paracoccidioides brasiliensis* Virulence. *MBio* **8**.
- 428 19. **Almeida F, Antonieto AC, Pessoni AM, Monteiro VN, Alegre-Maller AC,**  
429 **Pigosso LL, Pereira M, Soares CM, Roque-Barreira MC.** 2016. Influence  
430 of N-glycans on Expression of Cell Wall Remodeling Related Genes in  
431 *Paracoccidioides brasiliensis* Yeast Cells. *Curr Genomics* **17**:112-118.
- 432 20. **Linden JR, De Paepe ME, Laforce-Nesbitt SS, Bliss JM.** 2013. Galectin-3  
433 plays an important role in protection against disseminated candidiasis.  
434 *Med Mycol* **51**:641-651.
- 435 21. **Wu SY, Yu JS, Liu FT, Miaw SC, Wu-Hsieh BA.** 2013. Galectin-3  
436 negatively regulates dendritic cell production of IL-23/IL-17-axis  
437 cytokines in infection by *Histoplasma capsulatum*. *J Immunol* **190**:3427-  
438 3437.
- 439 22. **Ruas LP, Bernardes ES, Fermino ML, de Oliveira LL, Hsu DK, Liu FT,**  
440 **Chammas R, Roque-Barreira MC.** 2009. Lack of galectin-3 drives  
441 response to *Paracoccidioides brasiliensis* toward a Th2-biased immunity.  
442 *PLoS One* **4**:e4519.
- 443 23. **Chen HL, Liao F, Lin TN, Liu FT.** 2014. Galectins and neuroinflammation.  
444 *Adv Neurobiol* **9**:517-542.
- 445 24. **Saegusa J, Hsu DK, Chen HY, Yu L, Fermin A, Fung MA, Liu FT.** 2009.  
446 Galectin-3 Is Critical for the Development of the Allergic Inflammatory  
447 Response in a Mouse Model of Atopic Dermatitis. *American Journal of*  
448 *Pathology* **174**:922-931.
- 449 25. **Liu FT, Hsu DK, Zuberi RI, Kuwabara I, Chi EY, Henderson WR, Jr.**  
450 1995. Expression and function of galectin-3, a beta-galactoside-binding  
451 lectin, in human monocytes and macrophages. *Am J Pathol* **147**:1016-  
452 1028.
- 453 26. **Sano H, Hsu DK, Apgar JR, Yu L, Sharma BB, Kuwabara I, Izui S, Liu FT.**  
454 2003. Critical role of galectin-3 in phagocytosis by macrophages. *J Clin*  
455 *Invest* **112**:389-397.

- 456 27. **Cherayil BJ, Chaitovitz S, Wong C, Pillai S.** 1990. Molecular cloning of a  
457 human macrophage lectin specific for galactose. *Proc Natl Acad Sci U S A*  
458 **87**:7324-7328.
- 459 28. **Baum LG, Garner OB, Schaefer K, Lee B.** 2014. Microbe-Host  
460 Interactions are Positively and Negatively Regulated by Galectin-Glycan  
461 Interactions. *Front Immunol* **5**:284.
- 462 29. **Casals C, Campanero-Rhodes MA, Garcia-Fojeda B, Solis D.** 2018. The  
463 Role of Collectins and Galectins in Lung Innate Immune Defense. *Front*  
464 *Immunol* **9**:1998.
- 465 30. **Liu FT, Rabinovich GA.** 2010. Galectins: regulators of acute and chronic  
466 inflammation. *Ann N Y Acad Sci* **1183**:158-182.
- 467 31. **Sciacchitano S, Lavra L, Morgante A, Ulivieri A, Magi F, De Francesco**  
468 **GP, Bellotti C, Salehi LB, Ricci A.** 2018. Galectin-3: One Molecule for an  
469 Alphabet of Diseases, from A to Z. *Int J Mol Sci* **19**.
- 470 32. **Ascenzi P, Fasano M.** 2009. Serum heme-albumin: an allosteric protein.  
471 *IUBMB Life* **61**:1118-1122.
- 472 33. **Meierhofer T, van den Elsen JM, Cameron PJ, Munoz-Berbel X,**  
473 **Jenkins AT.** 2010. The interaction of serum albumin with cholesterol  
474 containing lipid vesicles. *J Fluoresc* **20**:371-376.
- 475 34. **Liu FT, Patterson RJ, Wang JL.** 2002. Intracellular functions of galectins.  
476 *Biochim Biophys Acta* **1572**:263-273.
- 477 35. **Beccaria CG, Amezcua Vesely MC, Fiocca Vernengo F, Gehrau RC,**  
478 **Ramello MC, Tosello Boari J, Gorosito Serran M, Mucci J, Piaggio E,**  
479 **Campetella O, Acosta Rodriguez EV, Montes CL, Gruppi A.** 2018.  
480 Galectin-3 deficiency drives lupus-like disease by promoting spontaneous  
481 germinal centers formation via IFN-gamma. *Nat Commun* **9**:1628.
- 482 36. **de Oliveira FL, Gatto M, Bassi N, Luisetto R, Ghirardello A, Punzi L,**  
483 **Doria A.** 2015. Galectin-3 in autoimmunity and autoimmune diseases.  
484 *Exp Biol Med (Maywood)* **240**:1019-1028.
- 485 37. **Fermin Lee A, Chen HY, Wan L, Wu SY, Yu JS, Huang AC, Miaw SC, Hsu**  
486 **DK, Wu-Hsieh BA, Liu FT.** 2013. Galectin-3 modulates Th17 responses  
487 by regulating dendritic cell cytokines. *Am J Pathol* **183**:1209-1222.
- 488 38. **Delaine T, Cumpstey I, Ingrassia L, Le Mercier M, Okechukwu P,**  
489 **Leffler H, Kiss R, Nilsson UJ.** 2008. Galectin-inhibitory thiodigalactoside  
490 ester derivatives have antimigratory effects in cultured lung and prostate  
491 cancer cells. *J Med Chem* **51**:8109-8114.
- 492 39. **Hsu DK, Yang RY, Pan ZX, Lu L, Salomon DR, Fung-Leung WP, Liu FT.**  
493 2000. Targeted disruption of the galectin-3 gene results in attenuated  
494 peritoneal inflammatory responses. *American Journal of Pathology*  
495 **156**:1073-1083.
- 496 40. **Dos Reis Almeida FB, Carvalho FC, Mariano VS, Alegre AC, Silva Rdo N,**  
497 **Hanna ES, Roque-Barreira MC.** 2011. Influence of N-glycosylation on the  
498 morphogenesis and growth of *Paracoccidioides brasiliensis* and on the  
499 biological activities of yeast proteins. *PLoS One* **6**:e29216.
- 500 41. **Vallejo MC, Matsuo AL, Ganiko L, Medeiros LC, Miranda K, Silva LS,**  
501 **Freytmuller-Haapalainen E, Sinigaglia-Coimbra R, Almeida IC, Puccia**  
502 **R.** 2011. The pathogenic fungus *Paracoccidioides brasiliensis* exports  
503 extracellular vesicles containing highly immunogenic alpha-Galactosyl  
504 epitopes. *Eukaryot Cell* **10**:343-351.

505

506

## FIGURE LEGENDS

### **Figure 1. Upregulated Gal-3 levels in humans during *P. brasiliensis* infection.**

Gal-3 levels in serum from healthy individuals (blue bar) and patients infected by *P. brasiliensis* (red bars) were assessed by ELISA. Gal-3 levels were higher in acute and chronic form patients infected with *P. brasiliensis* when compared with healthy individuals. Bars represent the mean  $\pm$  SD of Gal-3 levels obtained from triplicate samples. Statistically significant differences are denoted by asterisks (\*\*  $p < 0.005$ , unpaired Student's t-test).

### **Figure 2. Upregulated Gal-3 levels in mice during experimental *P. brasiliensis***

**infection.** C57BL/6 mice were intratracheally infected with Pb18 strain yeast cells (red bars) or PBS (blue bars) and Gal-3 levels were assessed in tissues and serum during the course of *P. brasiliensis* infection. On days 30 and 60 after infection, samples collected of lung (A), serum (B), and spleen (C) were homogenized and Gal-3 quantified by ELISA. Bars represent the mean  $\pm$  SD of Gal-3 levels obtained from triplicate measurements for each animal, with five animals per group. Statistically significant differences are denoted by asterisks (\*  $p < 0.05$ , \*\*  $p < 0.005$ , unpaired Student's t-test).

### **Figure 3. Gal-3 inhibits the growth and budding of *P. brasiliensis* yeast cells.**

MTT assay of *P. brasiliensis* Pb18 strain cultivated in YPD medium for 120 hours at 37°C with 10  $\mu$ g/ml of Gal-3 or denatured 10  $\mu$ g/ml Gal-3 (A). Number of cells with buds in YPD medium in the absence (blue bar), or presence of denatured Gal-3 (black bar), or presence of 10  $\mu$ g/ml Gal-3 (red bar) for 72 hours at 37°C. Buds were counted via light microscopy and quantified using a Neubauer chamber hemocytometer. (B).

Data are representative of three experiments showing mean  $\pm$  SD for each data point. Statistically significant differences are denoted by asterisks (\*  $p < 0.05$ , \*\*  $p < 0.005$ , \*\*\*  $p < 0.0005$ , unpaired Student's t-test).

**Figure 4. Gal-3 binds to *P. brasiliensis* cell wall.** *P. brasiliensis* Pb18 strain cultivated in YPD medium for 72 hours at 37°C, was resuspended in PBS and incubated sequentially with 40  $\mu\text{g/ml}$  of Gal-3, an anti-Gal-3 antibody and finally anti-rabbit IgG-FITC antibody. Binding was measured by flow cytometry; numbers inside histogram represents the percentage of positive cells recognized by Gal-3 (A). WGA lectin-FITC (30  $\mu\text{g/ml}$ ) as control of binding with cell wall (CW) (A). *P. brasiliensis* Pb18 strain was cultured at 37°C for 72 h and incubated with Gal-3. *P. brasiliensis* were stained for observation of cell wall with calcofluor white (blue) (B) and Gal-3 with anti-Gal-3 antibody (green) (C). Merged images are shown in D (cell wall and Gal-3). The images represent a single section from a Z series stack. Scale bar correspond to 10  $\mu\text{m}$ . Data are representative of three experiments and a representative image is shown.

**Figure 5. Gal-3 disrupts *P. brasiliensis* extracellular vesicles.** Purified radiolabelled vesicles after 72 h post [ $1\text{-}^{14}\text{C}$ ] palmitic acid addition were resuspended in PBS, BSA, denatured Gal-3, Gal-3 pre-incubated with lactosamine, Gal-3 (0.001 to 10  $\mu\text{g/mL}$ ) and release of radioactivity from vesicle pellet was assayed. Supernatant (blue bars) and pellet (red bars) radioactivity were assessed and normalized to 100% radioactivity for each individual sample (A). Hemocyanin, ovalbumin, concanavalin A (Con A), phytohaemagglutinin E (PHA-E), phytohaemagglutinin L (PHA-L), and bovine serum albumin (BSA) were used as control (B). Bars represent the mean  $\pm$  SD from

triplicate samples from one representative experiment. Experiments were repeated at least xx times. Statistically significant differences are denoted by asterisks (\*\*  $p < 0.005$ , unpaired Student's t-test).

**Figure 6. Gal-3 affects disruption and internalization of *P. brasiliensis* EVs by macrophages.** Purified radiolabelled EVs from *P. brasiliensis* Pb18 strain yeast cultures were added to cultures of C57BL6 WT or Gal-3<sup>-/-</sup> macrophages. After 1, 2, 6 or 12 h post EVs addition, the radioactivity recovered from the macrophages (adhered cells, uptake, red bars), whole vesicles (pellet, blue bars) and disrupted vesicles (supernatant, black bars) were quantified. Bars represent the mean  $\pm$  SD from triplicate samples from 3 representative experiments. Statistically significant differences are denoted by asterisks (\*\*  $p < 0.005$ , unpaired Student's t-test).

**Supplementary Figure 1. Co-localization of Gal-3 and cell wall of *P. brasiliensis*.** Co-localization of Gal-3 binding sites with cell wall structures was confirmed by the threshold Mander's coefficient tool available in the Fiji J software. Analysis by fluorescence microscopy included cell wall (Calcofluor white, CW, blue fluorescence) and Gal-3 binding sites (anti-Gal-3 antibody, green fluorescence). The whole image field was used to obtain the split threshold Mander's colocalization coefficient for each channel (Tm1/Tm2).

# Human serum

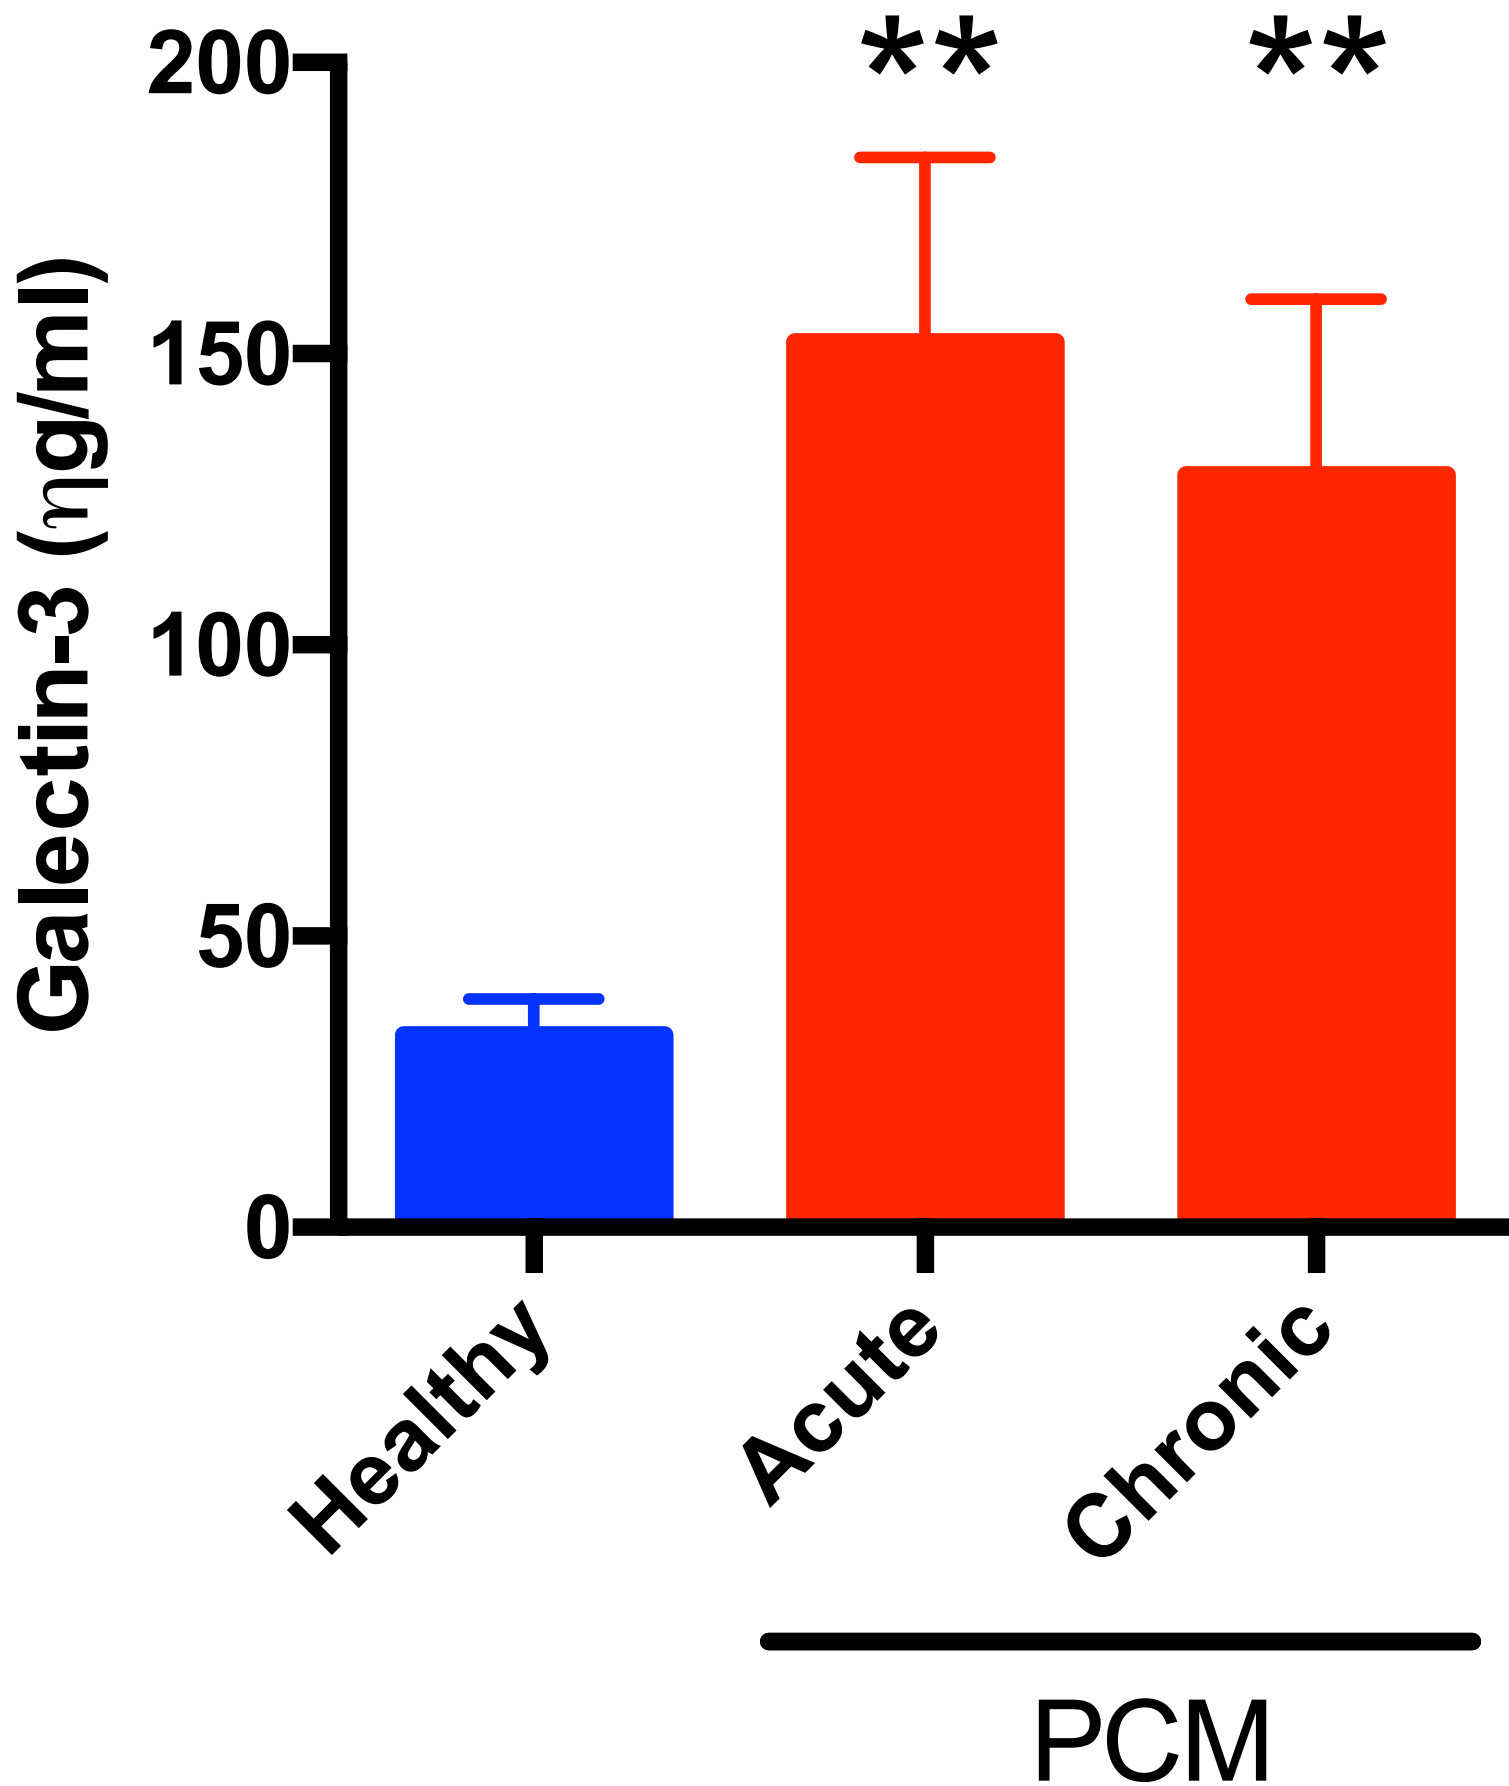

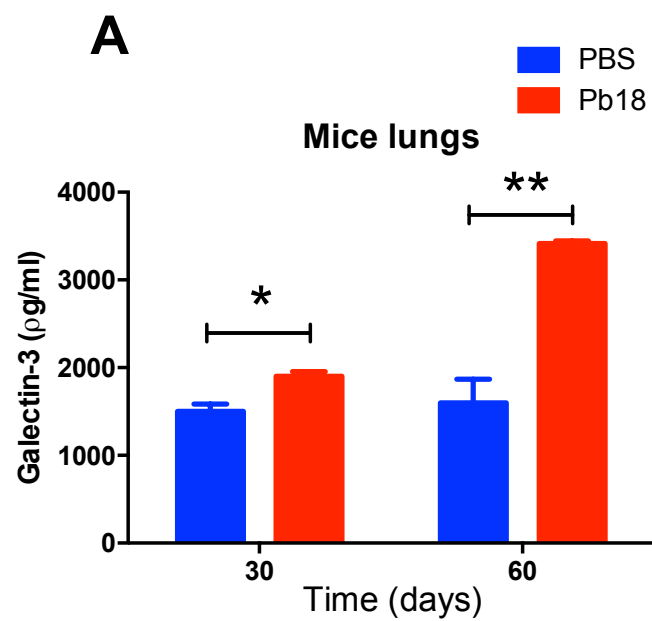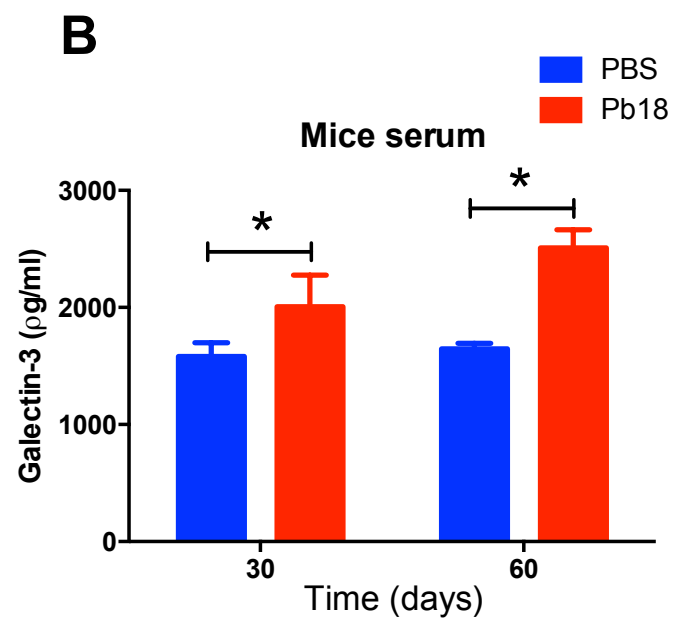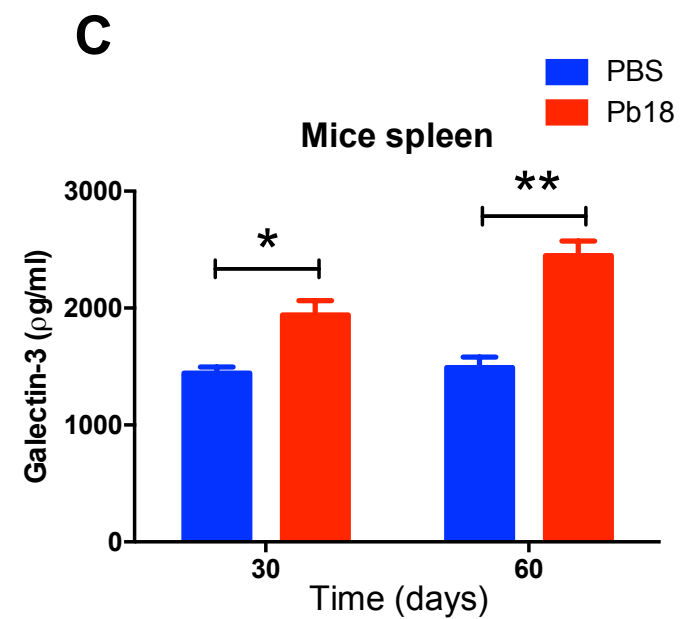



**A**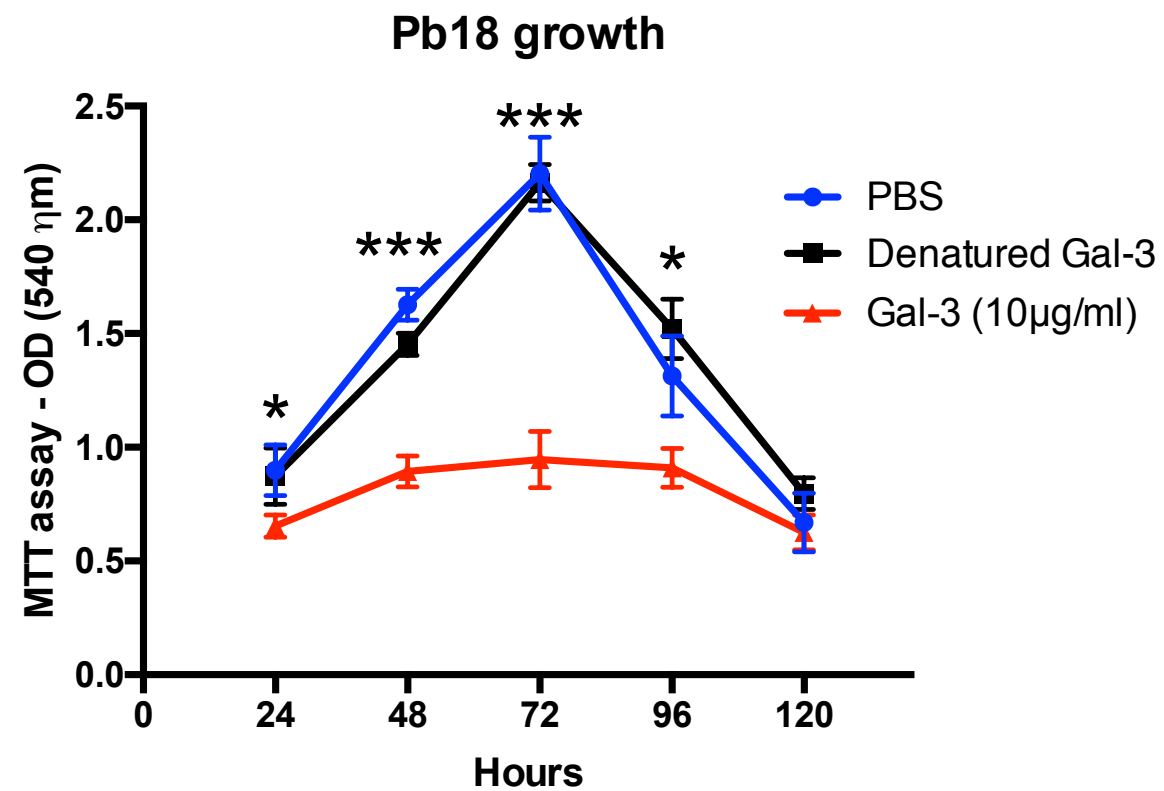**B**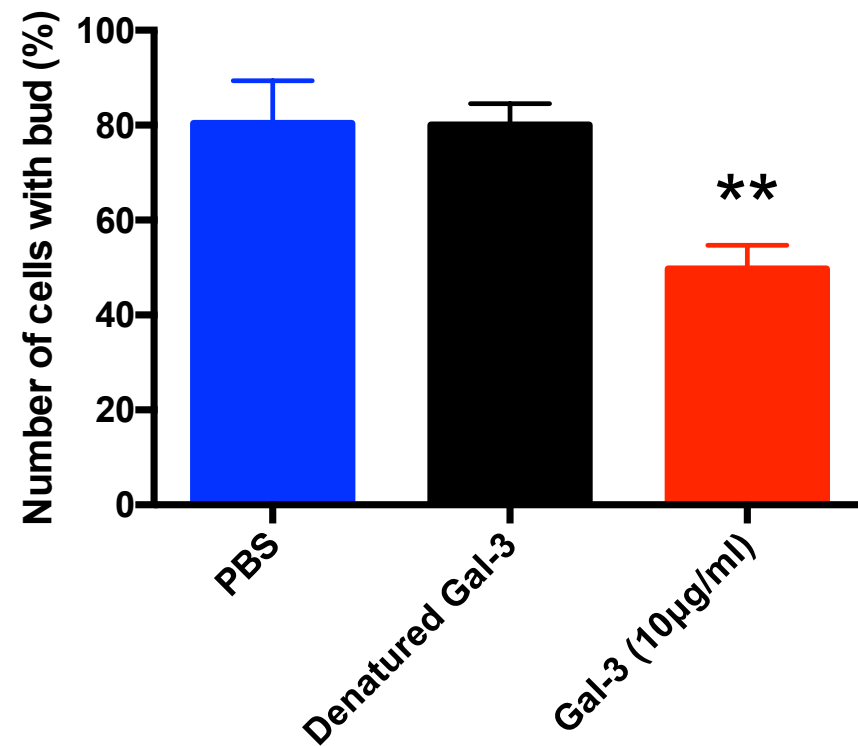

**A****Pb 18**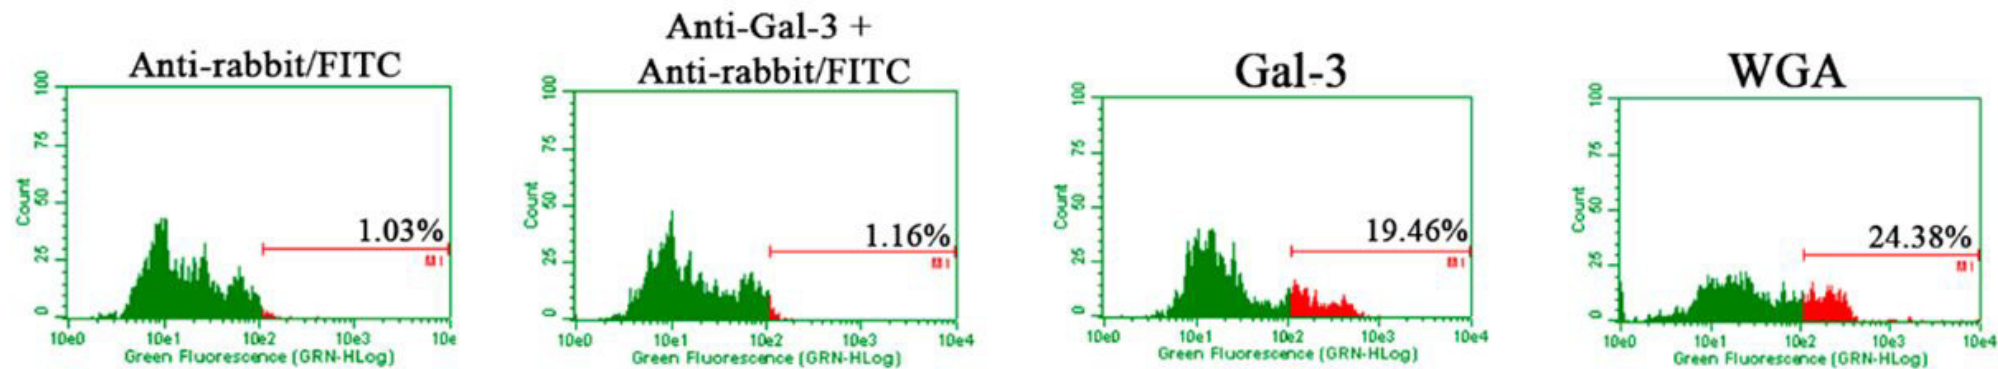**B**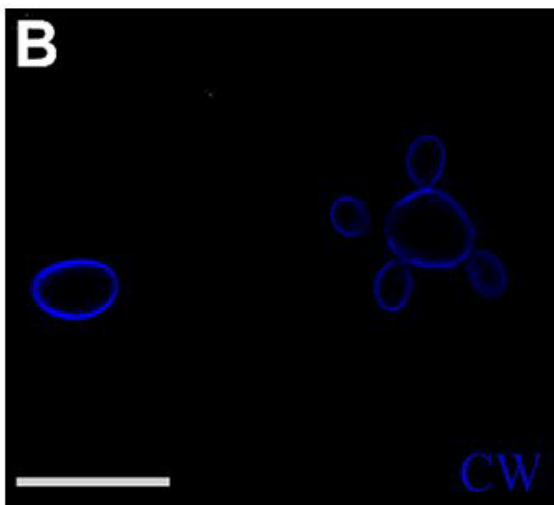**C**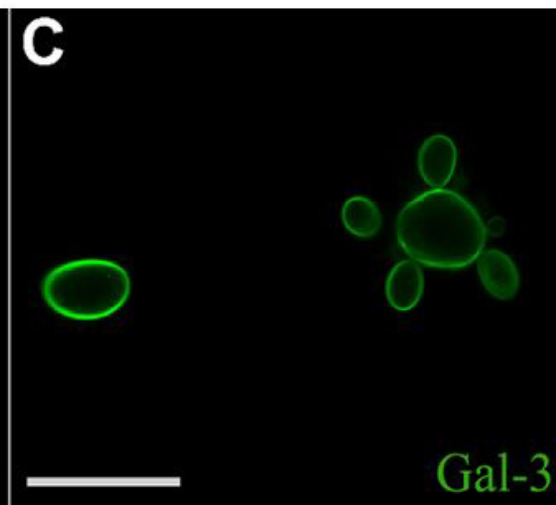**D**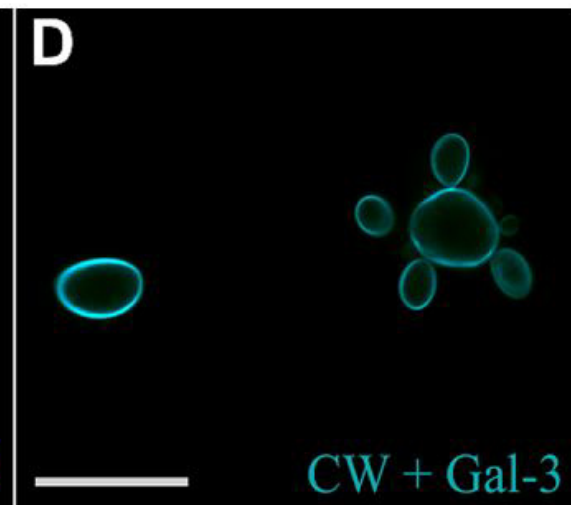

**A**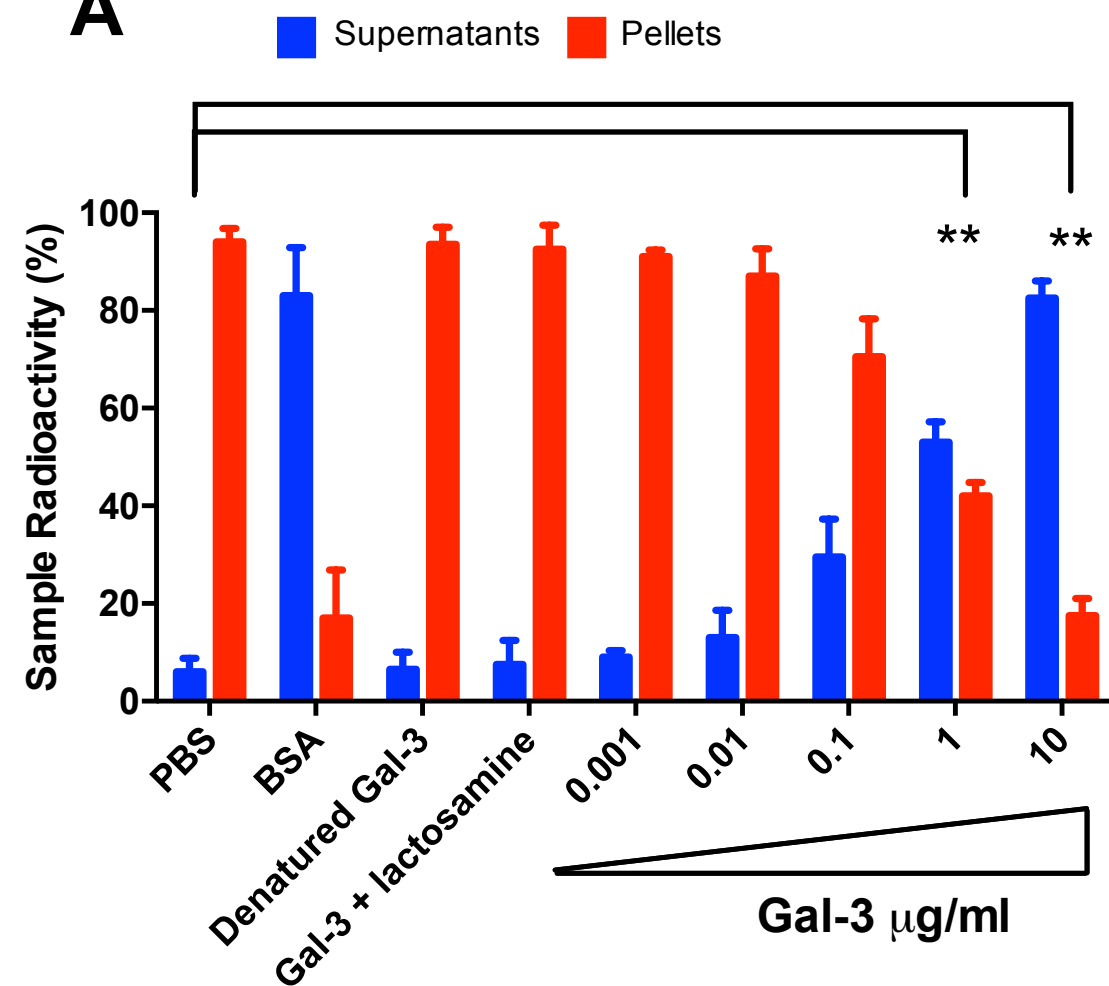**B**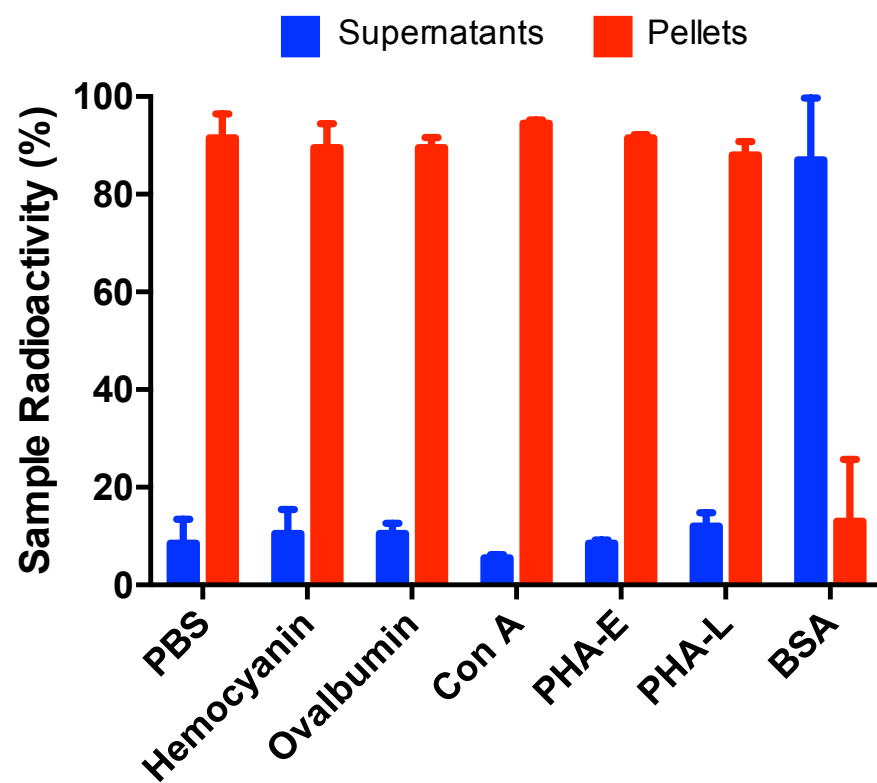

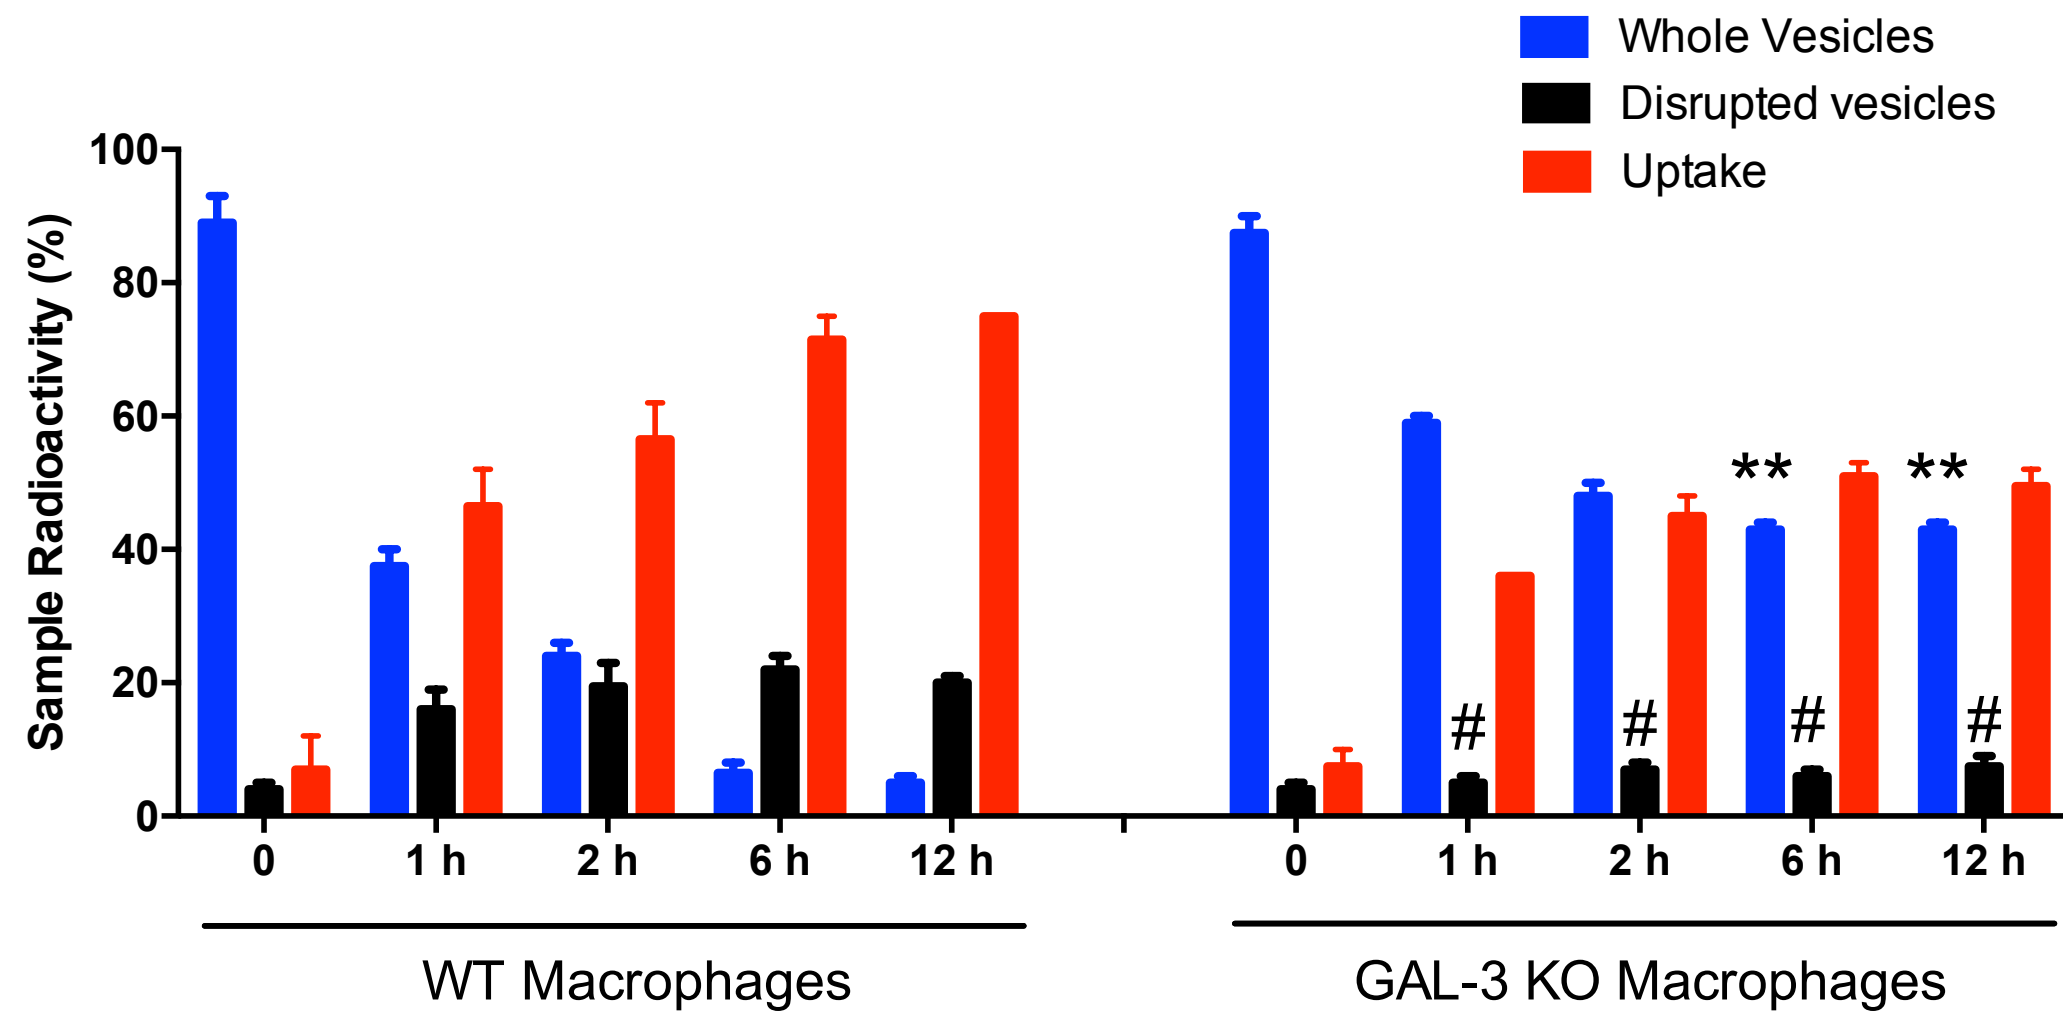

Source: https://www.biorxiv.org/content/10.1101/557918v1.full.pdf
